# Supplementary material for: Self-Hydrogen Supplied Catalytic Fractionation of Raw Biomass into Lignin-Derived Phenolic Monomers and Cellulose-Rich Pulps
Source: PubMed Central journal article supplement — JACS Au. 2023 Jun 29;3(7):1911–7. doi: 10.1021/jacsau.3c00154 (PMC10369670; doi:10.1021/jacsau.3c00154), 2023-06-29
Supplement: au3c00154_si_001.pdf [file au3c00154_si_001.pdf]

# Supporting information

## Self-hydrogen Supplied Catalytic Fractionation of Raw Biomass into Lignin-derived Phenolic Monomers and Cellulose-rich Pulps

Hao Zhou, Xiaohui Liu, Yong Guo\* and Yanqin Wang\*

### Corresponding Authors

Yong Guo — Key Laboratory for Advanced Materials and Joint International Research Laboratory of Precision Chemistry and Molecular Engineering Shanghai, Feringa Nobel Prize Scientist Joint Research Center, Research Institute of Industrial Catalysis, School of Chemistry and Molecular Engineering, East China University of Science and Technology, 130 Meilong Road, Shanghai, P. R. China;  
Email: guoyong@ecust.edu.cn

Yanqin Wang — Key Laboratory for Advanced Materials and Joint International Research Laboratory of Precision Chemistry and Molecular Engineering Shanghai, Feringa Nobel Prize Scientist Joint Research Center, Research Institute of Industrial Catalysis, School of Chemistry and Molecular Engineering, East China University of Science and Technology, 130 Meilong Road, Shanghai, P. R. China;  
Email: wangyanqin@ecust.edu.cn

### Authors

Hao Zhou — Key Laboratory for Advanced Materials and Joint International Research Laboratory of Precision Chemistry and Molecular Engineering Shanghai, Feringa Nobel Prize Scientist Joint Research Center, Research Institute of Industrial Catalysis, School of Chemistry and Molecular Engineering, East China University of Science and Technology, 130 Meilong Road, Shanghai, P. R. China;

Xiaohui Liu — Key Laboratory for Advanced Materials and Joint International Research Laboratory of Precision Chemistry and Molecular Engineering Shanghai, Feringa Nobel Prize Scientist Joint Research Center, Research Institute of Industrial Catalysis, School of Chemistry and Molecular Engineering, East China University of Science and Technology, 130 Meilong Road, Shanghai, P. R. China;



## Table of Contents

**Figure S1.** XRD patterns of the Pt/NiAl<sub>2</sub>O<sub>4</sub> catalyst.

**Figure S2.** HAADF-STEM and Particle size distributions of Pt in the freshly prepared Pt/NiAl<sub>2</sub>O<sub>4</sub> catalyst.

**Figure S3.** H<sub>2</sub>-TPR profile of Pt/NiAl<sub>2</sub>O<sub>4</sub> and NiAl<sub>2</sub>O<sub>4</sub>.

**Figure S4.** XPS spectra of (a) Pt 4d and (b) Ni 2p over the Pt/NiAl<sub>2</sub>O<sub>4</sub> catalyst.

**Figure S5.** GC spectra of the lignin-derived monomers from birch over the Pt/NiAl<sub>2</sub>O<sub>4</sub> catalyst. Reaction conditions: birch sawdust (0.5 g), Pt/NiAl<sub>2</sub>O<sub>4</sub> (0.1 g), H<sub>2</sub>O (10 mL), 140 °C, N<sub>2</sub> 1 atm, 12 h for (a) and 24 h for (b).

**Figure S6.** The information on the possible dimers of the lignin oils. (GC-MS spectra of silylated lignin oils and structure analyses for possible dimers).

**Figure S7.** The flow-process diagram of separation the catalyst and cellulose-rich pulp.

**Figure S8.** Gas products analysis in APR by using xylan (a) and cellulose (b) as substrates over the Pt/NiAl<sub>2</sub>O<sub>4</sub> catalyst.

**Figure S9.** HPLC spectra of liquid phase after reaction without any catalyst.

**Table S1.** Physicochemical property of Pt/NiAl<sub>2</sub>O<sub>4</sub> and NiAl<sub>2</sub>O<sub>4</sub>.

**Table S2.** Compositional analysis of various lignocellulosic biomass.<sup>a</sup>

**Table S3.** Monomer concentrations in various lignins.<sup>a</sup>

**Table S4.** SCF of lignocellulose through amplification.<sup>a</sup>

**Table S5.** Comparison of reductive catalytic fractionation results over different catalyst in literatures.

**Table S6.** Control experiment of SCF over the Pt/NiAl<sub>2</sub>O<sub>4</sub> catalyst using cellulose as substrate.<sup>a</sup>

**Table S7.** Monomers distribution and yields of SCF over the Pt/NiAl<sub>2</sub>O<sub>4</sub> catalyst with different substrates.<sup>a</sup>

**Scheme S1.** Possible routes for hemicellulose to produce H<sub>2</sub> and CO<sub>2</sub>

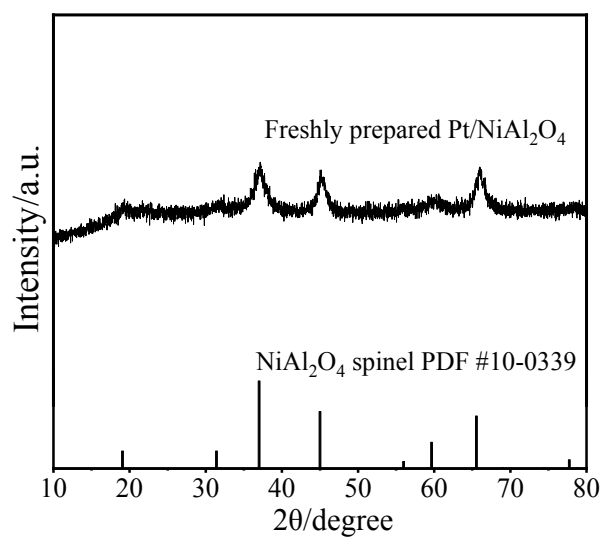

**Figure S1.** XRD patterns of the Pt/NiAl<sub>2</sub>O<sub>4</sub> catalyst.

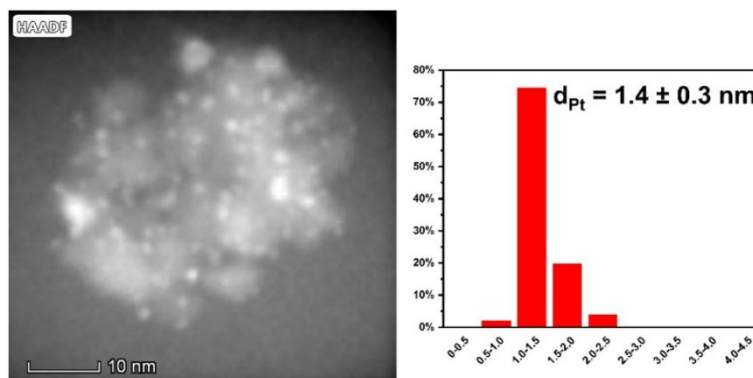

**Figure S2.** HAADF-STEM and Particle size distributions of Pt in the freshly prepared Pt/NiAl<sub>2</sub>O<sub>4</sub> catalyst.

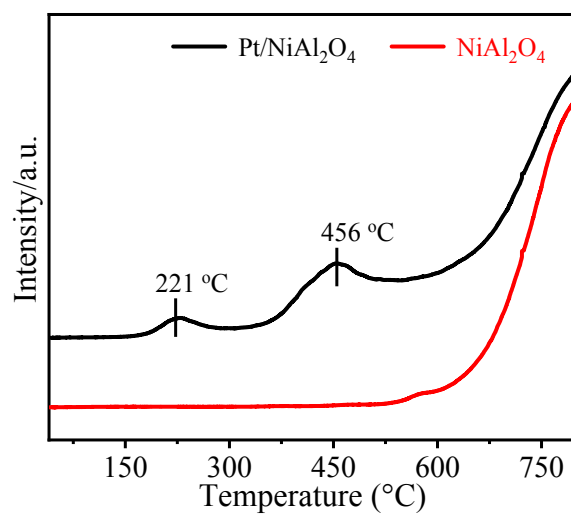

**Figure S3.** H<sub>2</sub>-TPR profile of Pt/NiAl<sub>2</sub>O<sub>4</sub> and NiAl<sub>2</sub>O<sub>4</sub>.

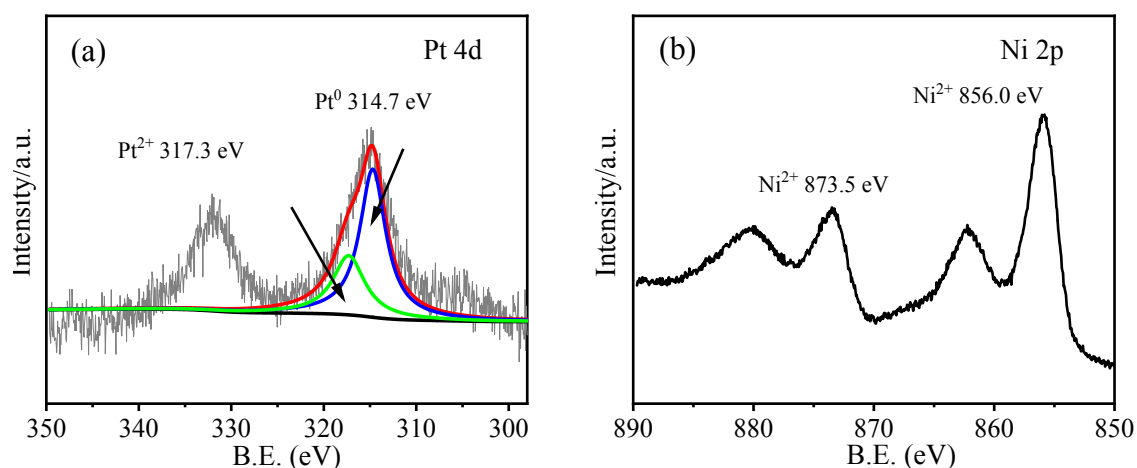

**Figure S4.** XPS spectra of (a) Pt 4d and (b) Ni 2p over the Pt/NiAl<sub>2</sub>O<sub>4</sub> catalyst.

The X-ray diffraction (XRD) patterns exhibited typical peaks ascribed to NiAl<sub>2</sub>O<sub>4</sub> (PDF # No. 10–0339), while there were no detectable Pt-related peaks, probably owing to the high dispersion of Pt and small particle size (Figure S1 & S2). The reduction peak at 221 °C in H<sub>2</sub>-TPR profile (Figure S3) can be assigned to the reduction of PtOx and the peak at 456 °C is related to the co-reduction of PtOx and NiOx species.<sup>1</sup> The Pt 4d<sub>5/2</sub> spectra in XPS spectra can be divided into two parts, 314.7 eV corresponding to the Pt<sup>0</sup> species, and 317.3 eV to the Pt<sup>2+</sup> species (Figure S4). While the chemical state of Ni is mainly composed of Ni<sup>2+</sup> species, 873.5 eV and 856.0 eV.<sup>2</sup>

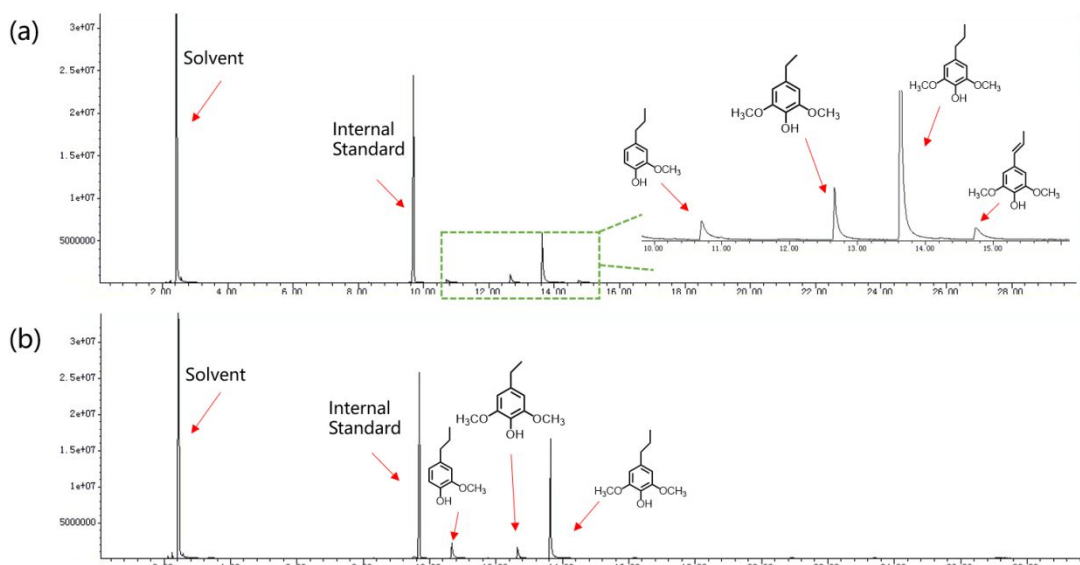

**Figure S5.** GC spectra of the lignin-derived monomers from birch over the Pt/NiAl<sub>2</sub>O<sub>4</sub> catalyst. Reaction conditions: birch sawdust (0.5 g), Pt/NiAl<sub>2</sub>O<sub>4</sub> (0.1 g), H<sub>2</sub>O (10 mL), 140 °C, N<sub>2</sub> 1 atm, 12 h for (a) and 24 h for (b).

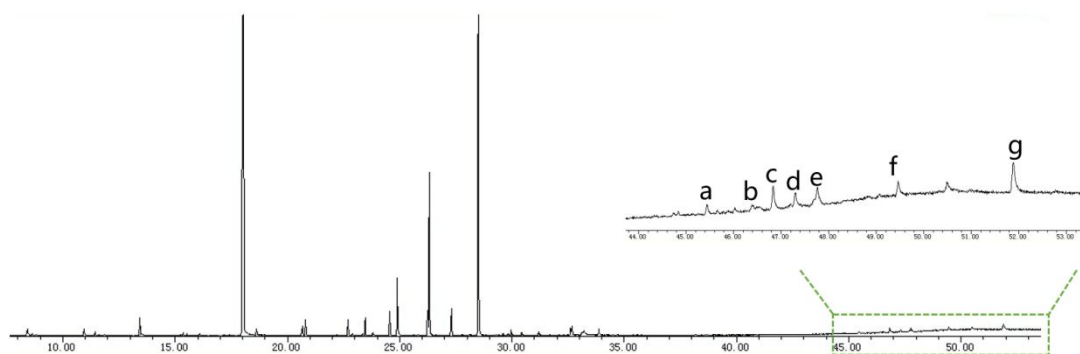

Dimer a (β-5): Molecular weight: 490

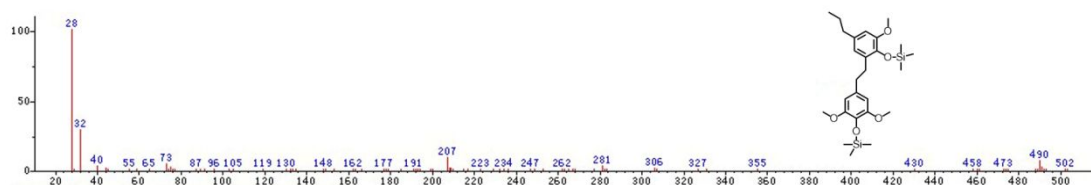

Dimer b (β-5): Molecular weight: 518

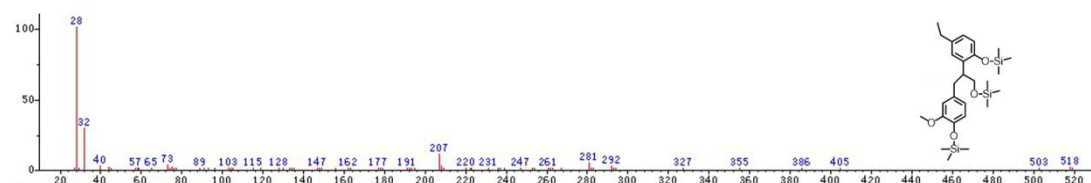

Dimer c ( $\beta$ - $\beta$ ): Molecular weight: 532

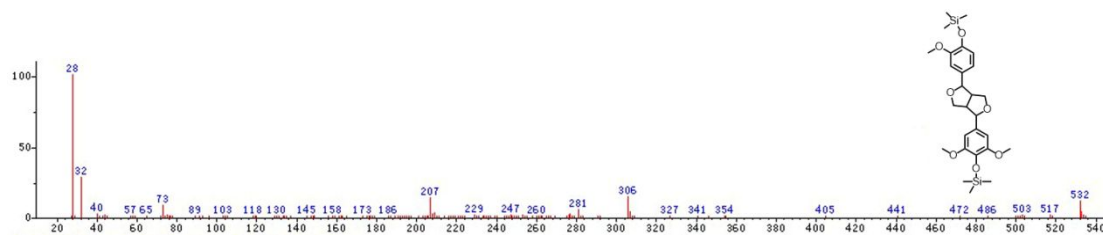

Dimer d ( $\beta$ -5): Molecular weight: 416

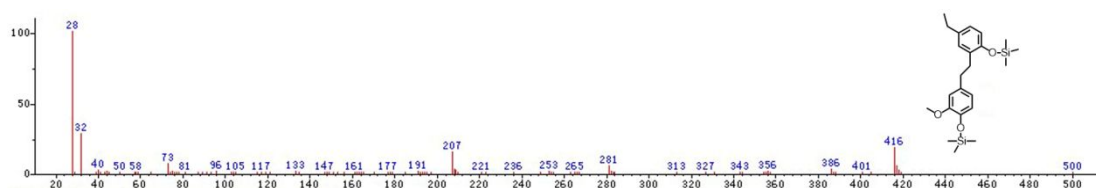

Dimer e ( $\beta$ -5): Molecular weight: 530

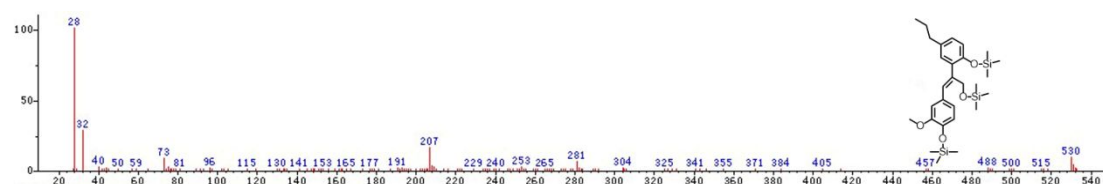

Dimer f ( $\beta$ -5): Molecular weight: 446

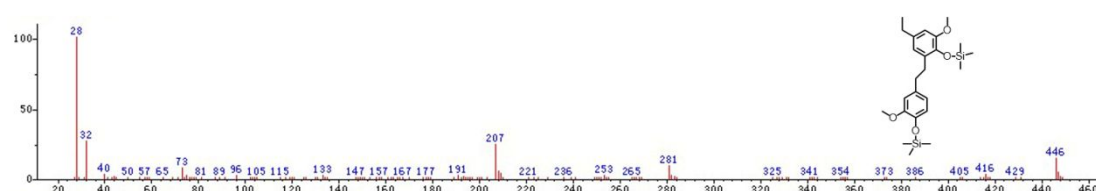

Dimer g ( $\beta$ -5): Molecular weight: 476

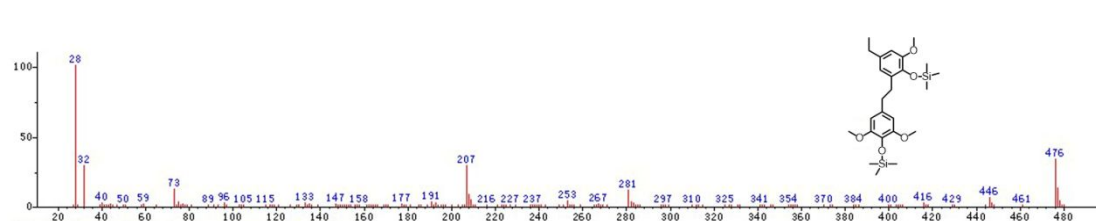

**Figure S6.** The information on the possible dimers of the lignin oils. (GC-MS spectra of silylated lignin oils and structure analyses for possible dimers).

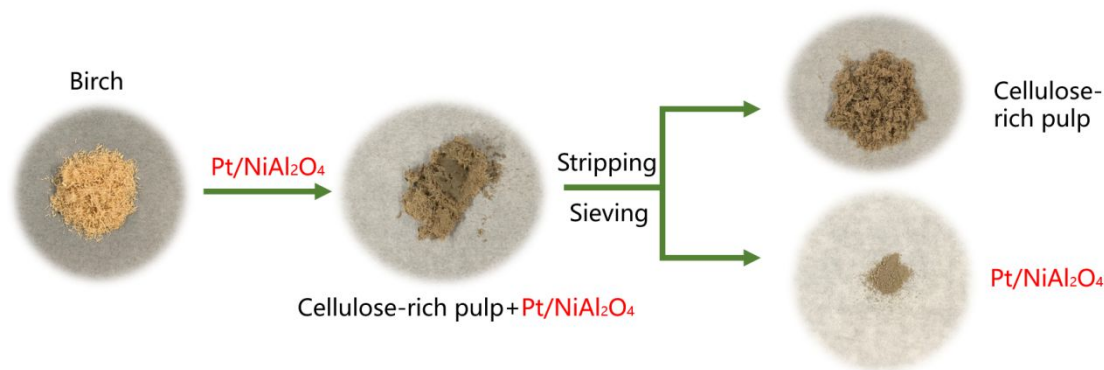

**Figure S7.** The flow-process diagram of separation the catalyst and cellulose-rich pulp.

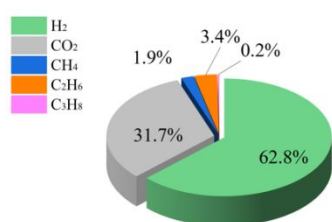

(a)

| $\text{H}_2$ production | $\text{H}_2$ selectivity | Carbon yield |
|-------------------------|--------------------------|--------------|
| 4668 $\mu\text{mol/g}$  | 76.5%                    | 8.13%        |

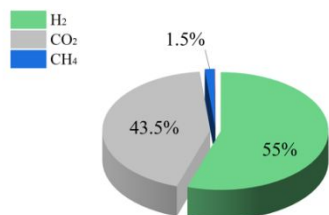

(b)

| $\text{H}_2$ production | $\text{H}_2$ selectivity | Carbon yield |
|-------------------------|--------------------------|--------------|
| 227 $\mu\text{mol/g}$   | 60.9%                    | 0.56%        |

**Figure S8.** Gas products analysis in APR by using xylan (a) and cellulose (b) as substrates over the  $\text{Pt/NiAl}_2\text{O}_4$  catalyst.

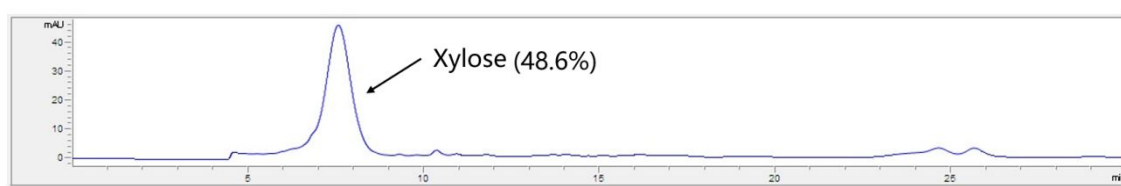

**Figure S9.** HPLC spectra of liquid phase after reaction without any catalyst.

Reaction conditions: birch sawdust (0.5 g),  $\text{H}_2\text{O}$  (10 mL), 140  $^\circ\text{C}$ ,  $\text{N}_2$  1 atm, 12 h.

**Table S1.** Physicochemical property of Pt/NiAl<sub>2</sub>O<sub>4</sub> and NiAl<sub>2</sub>O<sub>4</sub>.

| Catalyst                            | Metal content (wt%) | BET (m <sup>2</sup> g <sup>-1</sup> ) | Pore diameter (nm) |
|-------------------------------------|---------------------|---------------------------------------|--------------------|
| NiAl <sub>2</sub> O <sub>4</sub>    | -                   | 59.3                                  | 18.6               |
| Pt/NiAl <sub>2</sub> O <sub>4</sub> | 1.7                 | 61.6                                  | 17.2               |

**Table S2.** Compositional analysis of various lignocellulosic biomass.<sup>a</sup>

| Samples   | Cellulose (wt%) | HemiCellulose (wt%) | AIL (wt%) | AIL (wt%) | Total (wt%) |
|-----------|-----------------|---------------------|-----------|-----------|-------------|
| Birch     | 43.6            | 18.4                | 23.6      | 0.4       | 86.0        |
| Poplar    | 45.3            | 22.1                | 20.1      | 0.8       | 87.5        |
| Beech     | 41.1            | 19.4                | 21.2      | 0.5       | 82.2        |
| Pine      | 47.6            | 9.3                 | 29.4      | 0.6       | 86.9        |
| Cornstalk | 37.6            | 16.4                | 11.7      | 0.4       | 66.1        |

Note: Biomass compositions were determined according to standard analytical procedure (NREL/TP-510-42618).<sup>3</sup> The biomass powders (60-mesh) were extracted with toluene/ethanol (2:1, v/v) in a Soxhlet instrument for 12 h, and then dried at 80 °C for 5 h. The mixture containing 300 mg of dried biomass and 3 mL of 72 wt% H<sub>2</sub>SO<sub>4</sub> solution were stirred at 30 °C for 1 h, which was then diluted by adding 84 mL deionized water, and heated at 121 °C for 1 h in the high-pressure sterilizer. After the reactor was cooled to room temperature, the solid residue and solution were separated through filtration. The solid residue was dried at 110 °C to gain Klason lignin (AIL). The acid soluble lignin (ASL) in filtrate was analysed using UV spectra by recording the absorbance of the soluble fraction at 240 nm. Finally, the determination of carbohydrates in the aqueous soluble fraction was performed on HPLC system.

**Table S3.** Monomer concentrations in various lignins.<sup>a</sup>

| Lignin    | Concentration / $\mu\text{mol g}^{-1}$ |     |    |
|-----------|----------------------------------------|-----|----|
|           | S                                      | G   | H  |
| Birch     | 2272                                   | 221 | 52 |
| Poplar    | 670                                    | 450 | 22 |
| Beech     | 1458                                   | 490 | 51 |
| Pine      | 23                                     | 940 | 0  |
| Cornstalk | 612                                    | 33  | 0  |

<sup>a</sup>The monomer analysis of lignin was carried out via alkaline nitrobenzene oxidation (NBO) according to the previous literature.<sup>4</sup> The biomass powders (40 mg) was mixed with nitrobenzene (0.4 mL) and 2 M NaOH (7 mL) and reacted at 170°C for 2 h. Afterwards, the

reactor was cooled in ice water and 1 mL of freshly prepared ethyl vanillin (3-ethoxy-4-hydroxybenzaldehyde, EV) (5  $\mu\text{mol/mL}$ ) in 0.1 M NaOH solution was added to the reaction mixture as an internal standard. The mixture was transferred to a 100 mL separatory funnel and washed three times with 15 mL of dichloromethane. The remaining aqueous layer was acidified with 2 M HCl, until the pH was below 3.0 and extracted twice with 20 mL of dichloromethane and 20 mL of diethyl ether. The combined organic layer was washed with deionized water (20 mL) and dried over  $\text{Na}_2\text{SO}_4$ . After filtration, the filtrate was collected in a 100 mL pear shaped flask and dried under reduced pressure. For the TMS (trimethylsilyl) derivatization step, NBO-products were washed with pyridine ( $3 \times 200 \mu\text{L}$ ) into a GC vial and BSTFA (150  $\mu\text{L}$ ) was added. The mixture was heated to  $50^\circ\text{C}$  for 30 min. The silylated NBO-products were analysed by GC-MS (Agilent 7890A) and quantitatively analysed by GC (Agilent 7890B) with a flame ionization detector, both equipped with HP-5 capillary columns.

**Table S4.** SCF of lignocellulose through amplification.<sup>a</sup>

| Lignin-oil <sup>b</sup><br>(wt%) | Monomers<br>yields <sup>c</sup> (wt%) | Monomer content<br>in lignin oil <sup>d</sup> (wt%) | Molar yields of<br>monomers <sup>e</sup> (mol%) | H <sub>2</sub> in the Gas<br>( $\mu\text{mol/g}$ ) |
|----------------------------------|---------------------------------------|-----------------------------------------------------|-------------------------------------------------|----------------------------------------------------|
| 22.8                             | 39.2                                  | 41.2                                                | 82.1                                            | 319                                                |

<sup>a</sup> Reaction conditions: birch sawdust (5 g), Pt/NiAl<sub>2</sub>O<sub>4</sub> (1 g), solvent (100 mL),  $140^\circ\text{C}$ , N<sub>2</sub> 1 atm, 24 h. <sup>b</sup> Based on the mass of lignocellulosic biomass. <sup>c</sup> The yields of monomers is based on Klason lignin content of 24 wt% from birch. <sup>d</sup> Based on the mass of lignin oil. <sup>e</sup> The mole yields of monomers is based on the mole of lignin monomers in lignocellulosic biomass.

**Table S5.** Comparison of reductive catalytic fractionation results over different catalyst in literatures.

| Catalyst                                                    | Reaction conditions |                 |                                                        |                        |             | Primary monomers <sup>a</sup>  | Total monomers yield | Deligni-fication | Sugar retention             | Ref.      |
|-------------------------------------------------------------|---------------------|-----------------|--------------------------------------------------------|------------------------|-------------|--------------------------------|----------------------|------------------|-----------------------------|-----------|
|                                                             | Biomass             | Catalyst dosage | Solvent                                                | Atmosphere             | Temp./Time  |                                |                      |                  |                             |           |
| RuN/ZnO/C<br>(Ru, 0.12 wt%)                                 | Birch<br>(0.25 g)   | 0.025 g         | MeOH (15 mL)                                           | H <sub>2</sub> (3 Mpa) | 240 °C/4 h  | Pr-G; Pr-S                     | 46.4 wt%             | 95 wt%           | C6 (96 wt%)/<br>C5 (72 C%)  | 5         |
| Pt/ $\gamma$ -Al <sub>2</sub> O <sub>3</sub><br>(Pt, 1 wt%) | Birch<br>(2 g)      | 0.5 g           | MeOH/H <sub>2</sub> O (40 mL)                          | N <sub>2</sub> (3 atm) | 230 °C/3 h  | Pr-S; Pe-S                     | 49 wt%               | 94 wt%           | C6 (41 wt%)/<br>C5 (<1 wt%) | 6         |
| Pd/CN <sub>x</sub><br>(Pd, 0.25 wt%)                        | Birch<br>(3 g)      | 0.45 g          | MeOH (60 mL)                                           | H <sub>2</sub> (3 Mpa) | 250 °C/3 h  | Pr-G; Pr-S;<br>Pe-S            | 52.7 C%              | 87.1 wt%         | 84.2 wt%                    | 7         |
| Pd/C<br>(Pd, 5 wt%)                                         | Poplar<br>(2 g)     | 0.2 g           | MeOH (40 mL)<br>H <sub>3</sub> PO <sub>4</sub> (5 g/L) | H <sub>2</sub> (2 Mpa) | 200 °C/3 h  | POH-G;<br>POH-S                | 42 wt%               | 96 wt%           | C6 (91 wt%)/<br>C5 (27 wt%) | 8         |
| Ru/C<br>(Ru, 5 wt%)                                         | Birch<br>(2 g)      | 0.3 g           | MeOH (40 mL)                                           | H <sub>2</sub> (3 Mpa) | 250 °C/6 h  | Pr-G; Pr-S                     | 52 C%                | 92 wt%           | C6 (95 wt%)/<br>C5 (47 wt%) | 9         |
| Ni/C<br>(Ni, 10 wt%)                                        | Birch<br>(2 g)      | 0.1 g           | MeOH (40 mL)                                           | Ar (1 atm)             | 200 °C/6 h  | Pr-G; Pr-S                     | 54 wt%               | -                | -                           | 10        |
| Ni <sub>1</sub> -Fe <sub>1</sub> /C<br>(Ni, 5 wt%)          | Birch<br>(0.5 g)    | 0.05 g          | MeOH (10 mL)                                           | H <sub>2</sub> (2 Mpa) | 200 °C/6 h  | Pr-G; Pr-S                     | 39.5 wt%             | -                | -                           | 11        |
| Pt <sub>1</sub> Ni/C<br>(Pt, 0.3 wt%)                       | Birch<br>(0.1 g)    | 0.02 g          | MeOH (5 mL)                                            | H <sub>2</sub> (5 Mpa) | 300 °C/18 h | Pr-G; Pr-S                     | 43 wt%               | -                | -                           | 12        |
| Co-phen/C<br>(Co, 0.45 wt%)                                 | Birch<br>(0.2 g)    | 0.03 g          | MeOH/H <sub>2</sub> O<br>(6 ml)<br>HCOOH/Na            | Ar (1 atm)             | 200 °C/4 h  | Pr-G; Pr-S;<br>Pe-G; Pe-S      | 34 wt%               | -                | -                           | 13        |
| Cu20-PMO<br>(Cu, 15.4 wt%)                                  | Poplar<br>(1 g)     | 0.2 g           | MeOH (10 mL)                                           | H <sub>2</sub> (4 Mpa) | 180 °C/18 h | Pr-G; Pr-S;<br>POH-G;<br>POH-S | 36 wt%               | -                | -                           | 14        |
| Pt/NiAl <sub>2</sub> O <sub>4</sub><br>(Pt, 2 wt%)          | Birch<br>(0.5 g)    | 0.1 g           | H <sub>2</sub> O<br>(10 mL)                            | N <sub>2</sub> (1 atm) | 140 °C/24 h | Pr-G; Pr-S                     | 46.6 wt%             | 95 wt%           | C6 (91 wt%)/<br>C5 (36 wt%) | This work |

<sup>a</sup>Primary monomers:

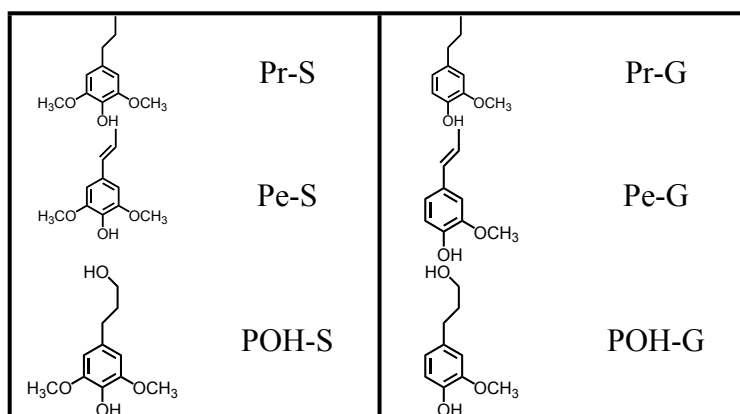

**Table S6.** Control experiment of SCF over the Pt/NiAl<sub>2</sub>O<sub>4</sub> catalyst using cellulose as substrate.<sup>a</sup>

| The mass of cellulose before reaction (g) | The mass of cellulose after reaction (g) | Retention (wt%) |
|-------------------------------------------|------------------------------------------|-----------------|
| 0.2 g                                     | 0.18                                     | 90              |

<sup>a</sup> Reaction conditions: cellulose (0.2 g), Pt/NiAl<sub>2</sub>O<sub>4</sub> (0.1 g), H<sub>2</sub>O (10 mL), 140 °C, N<sub>2</sub> 1 atm, 12 h.

**Table S7.** Monomers distribution and yields of SCF over the Pt/NiAl<sub>2</sub>O<sub>4</sub> catalyst with different substrates.<sup>a</sup>

| Substrates       | Phenolic monomers yield (wt%) |       |      |      |      | Total(wt%) |
|------------------|-------------------------------|-------|------|------|------|------------|
|                  | Er-G                          | Pr-G  | Er-S | Pe-S | Pr-S |            |
| Lignin+Xylan     | -                             | 0.3   | 5.7  | -    | 1.9  | 7.9        |
| Lignin+Xylose    | -                             | 3.2   | 3.1  | 1.6  | 11.6 | 19.5       |
| Lignin+Cellulose | -                             | trace | 1.1  | -    | 1.1  | 2.2        |
| Lignin           | -                             | trace | 0.9  | -    | 0.8  | 1.7        |

<sup>a</sup> Reaction conditions: lignin (0.1 g) or lignin (0.1g) + xylan/xylose/cellulose (0.2 g), Pt/NiAl<sub>2</sub>O<sub>4</sub> (0.1 g), H<sub>2</sub>O (10 mL), 140 °C, N<sub>2</sub> 1 atm, 12 h.

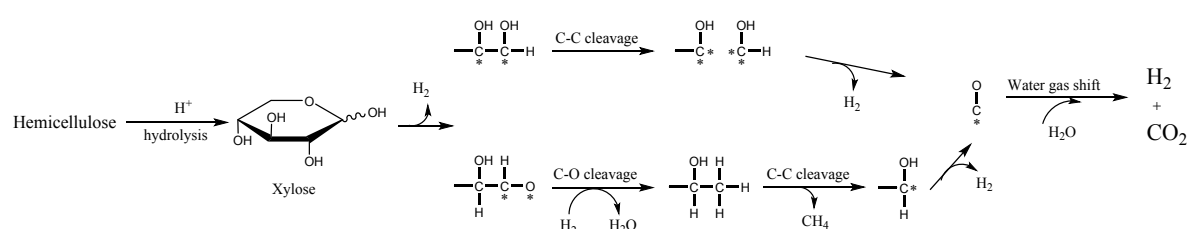

**Scheme S1.** Possible routes for hemicellulose to produce H<sub>2</sub> and CO<sub>2</sub>

## References

- (1) Li, D.; Li, Y.; Liu, X.; Guo, Y.; Pao, C.-W.; Chen, J.-L.; Hu, Y.; Wang, Y. NiAl<sub>2</sub>O<sub>4</sub> Spinel Supported Pt Catalyst: High Performance and Origin in Aqueous-Phase Reforming of Methanol. *ACS Catal.* **2019**, *9* (10), 9671-9682. DOI: 10.1021/acscatal.9b02243.
- (2) Schreifels, J. A.; Maybury, P. C.; Swartz, W. E. X-Ray photoelectron spectroscopy of nickel boride catalysts: Correlation of surface states with reaction products in the hydrogenation of acrylonitrile. *J. Catal.* **1980**, *65* (1), 195-206. DOI: [https://doi.org/10.1016/0021-9517\(80\)90294-8](https://doi.org/10.1016/0021-9517(80)90294-8).
- (3) Sluiter, A.; Hames, B.; Ruiz, R.; Scarlata, C.; Sluiter, J.; Templaton, D.; Crocker, D. Determination of structural carbohydrates and lignin in biomass, Technical Report (NREL/TP-510-42618). *Natl. Renew. Energy Lab* **2010**.
- (4) Shuai, L.; Amiri, M. T.; Questell-Santiago, Y. M.; Héroguel, F.; Li, Y.; Kim, H.; Meilan, R.; Chapple, C.; Ralph, J.; Luterbacher, J. S. Formaldehyde stabilization facilitates lignin monomer production during biomass depolymerization. *Science* **2016**, *354* (6310), 329-333. DOI: 10.1126/science.aaf7810.
- (5) Liu, Z.; Li, H.; Gao, X.; Guo, X.; Wang, S.; Fang, Y.; Song, G. Rational highly dispersed ruthenium for reductive catalytic fractionation of lignocellulose. *Nat. Commun.* **2022**, *13* (1), 4716. DOI: 10.1038/s41467-022-32451-5.
- (6) Ouyang, X.; Huang, X.; Zhu, J.; Boot, M. D.; Hensen, E. J. M. Catalytic Conversion of Lignin in Woody Biomass into Phenolic Monomers in Methanol/Water Mixtures without External Hydrogen. *ACS Sustainable Chem. Eng.* **2019**, *7* (16), 13764-13773. DOI: 10.1021/acssuschemeng.9b01497.
- (7) Park, J.; Cahyadi, H. S.; Mushtaq, U.; Verma, D.; Han, D.; Nam, K.-W.; Kwak, S. K.; Kim, J. Highly Efficient Reductive Catalytic Fractionation of Lignocellulosic Biomass over Extremely Low-Loaded Pd Catalysts. *ACS Catal.* **2020**, *10* (21), 12487-12506. DOI: 10.1021/acscatal.0c03393.
- (8) Renders, T.; Schutyser, W.; Van den Bosch, S.; Koelewijn, S.-F.; Vangeel, T.; Courtin, C. M.; Sels, B. F. Influence of Acidic (H<sub>3</sub>PO<sub>4</sub>) and Alkaline (NaOH) Additives on the Catalytic Reductive Fractionation of Lignocellulose. *ACS Catal.* **2016**, *6* (3), 2055-2066. DOI: 10.1021/acscatal.5b02906.
- (9) Van den Bosch, S.; Schutyser, W.; Vanholme, R.; Driessen, T.; Koelewijn, S. F.; Renders, T.; De Meester, B.; Huijgen, W. J. J.; Dehaen, W.; Courtin, C. M.; et al. Reductive lignocellulose fractionation into soluble lignin-derived phenolic monomers and dimers and processable carbohydrate pulps. *Energy Environ. Sci.* **2015**, *8* (6), 1748-1763. DOI: 10.1039/c5ee00204d.
- (10) Song, Q.; Wang, F.; Cai, J.; Wang, Y.; Zhang, J.; Yu, W.; Xu, J. Lignin depolymerization (LDP) in alcohol over nickel-based catalysts via a fragmentation–hydrogenolysis process. *Energy Environ. Sci.* **2013**, *6* (3), 994-1007. DOI: 10.1039/c2ee23741e.
- (11) Zhai, Y.; Li, C.; Xu, G.; Ma, Y.; Liu, X.; Zhang, Y. Depolymerization of lignin via a non-precious Ni–Fe alloy catalyst supported on activated carbon. *Green Chem.* **2017**, *19* (8), 1895-1903. DOI: 10.1039/c7gc00149e.
- (12) Chen, L.; Pan, L.; van Muyden, A. P.; Bai, L.; Li, J.; Tong, Y.; Fei, Z.; Hagfeldt, A.; Laurenczy, G.; Dyson, P. J. Anchoring single platinum atoms onto nickel nanoparticles affords highly selective catalysts for lignin conversion. *Cell Rep. Phys. Sci.* **2021**, *2* (9). DOI: 10.1016/j.xcrp.2021.100567.
- (13) Rautiainen, S.; Di Francesco, D.; Katea, S. N.; Westin, G.; Tungasmita, D. N.; Samec, J. S. M. Lignin Valorization by Cobalt-Catalyzed Fractionation of Lignocellulose to Yield Monophenolic Compounds. *ChemSusChem* **2019**, *12* (2), 404-408. DOI: 10.1002/cssc.201802497.
- (14) Sun, Z.; Bottari, G.; Afanasenko, A.; Stuart, M. C. A.; Deuss, P. J.; Fridrich, B.; Barta, K. Complete lignocellulose conversion with integrated catalyst recycling yielding valuable aromatics and fuels. *Nat. Catal.* **2018**, *1* (1), 82-92. DOI: 10.1038/s41929-017-0007-z.
